# Supplementary material for: Does attentional suppression occur at the level of perception or decision-making? Evidence from Gaspelin et al.’s (2015) probe letter task
Source: Springer Nature journal article supplement (doi:10.1007/s00426-022-01734-3), 2022-09-12
Supplement: MOESM1 [file 23480296]

## Supplementary Material

### Congruency effects in Experiment 3

In Experiment 3, two letters “o” and two letters “+” were randomly distributed across the four positions. As a result, the correspondence between the letter at the target position and the letter at the distractor or nontarget position could be evaluated. In previous research, it was observed that the identity of a colored distractor letter interfered with the discrimination of the target letter (Theeuwes & Burger, 1998; Zivony & Lamy, 2018). That is, responses were slowed by the presence of a colored distractor letter and the increase in reaction times (RTs) was more pronounced when the identity of the distractor did not correspond to the identity of the target letter (but see Becker, 2007). The effect of correspondence was attributed to “identity intrusions” from attended stimuli. In the probe task of the current paper, participants attended to the target of the search task, but were required to indicate the identity of the letter at distractor or nontarget locations. Because the target location was attended as part of the primary search task, we expect identity intrusions for trials where the letter at the distractor or nontarget locations had to be reported. To assess this hypothesis, we submitted percentages of correct responses to a 2 (shape: distractor, nontarget) x 2 (letter correspondence: corresponding, non-corresponding) repeated-measures ANOVA. Performance was better when the letter at the target location corresponded to the letter at the probed location (81.8% vs. 73.3%),  $F(1, 35) = 25.87, p < .01, \eta_p^2 = .425$ , confirming the expected identity intrusions from the probe letter at the target location. As in the analysis reported in the main text, there was no difference between distractor and nontarget shapes (76.5% vs. 78.6%),  $F(1, 35) = 2.18, p = .14, \eta_p^2 = .059$ . Importantly, there was no interaction between shape and letter correspondence,  $F(1, 35) = 0.45, p = .51, \eta_p^2 = .013$ , suggesting that effects of shape and correspondence were additive. Thus, the identity intrusions from the target shape were similar for reports of probe letters on distractor and nontarget shapes.

### Effects of distractor repetition in Experiment 3

We asked whether the suppression effect would increase when a distractor-present trial was preceded by another distractor-present trial compared to when it was preceded by a distractor-absent trial. To assess effects of distractor repetition in the crucial comparison of

1 distractor and nontarget shapes, we submitted percentages correct to a 2 (shape: distractor,  
2 nontarget) x 2 (distractor on trial n-1: present, absent) repeated-measures ANOVA. As in the  
3 analysis reported in the main text, the difference between distractor and nontarget shapes was  
4 not reliable (77.7% vs. 80.4%),  $F(1, 35) = 4.01, p = .053, \eta_p^2 = .103$ . While the main effect of  
5 distractor presence on trial n-1 did not reach significance,  $F(1, 35) = 0.69, p = .412, \eta_p^2 = .019$ ,  
6 there was a significant interaction,  $F(1, 35) = 6.26, p = .02, \eta_p^2 = .152$ . Suppression of the  
7 distractor relative to the nontarget shapes was more pronounced when the distractor was  
8 absent on trial n-1 (75.7% vs. 81.2%) compared to when it was present (79.7% vs. 79.5%). The  
9 interaction shows that distractor suppression did not increase over trials, but was strongest on  
10 the trial where it was triggered (i.e., after a distractor-absent trial).

11         However, the interaction of distractor presence and distractor repetition in the probe  
12 task was not matched by a corresponding interaction in RTs of the search task. A 2 (distractor:  
13 present, absent) x 2 (trial n-1: distractor-present, distractor-absent) repeated-measures ANOVA  
14 on RTs in Experiment 3 confirmed shorter RTs on distractor-present than -absent trials (700 vs.  
15 711 ms),  $F(1, 35) = 5.44, p = .03, \eta_p^2 = .134$ , but neither the effect of distractor presence on trial  
16 n-1,  $F(1, 35) = 0.85, p = .36, \eta_p^2 = .024$ , nor the interaction,  $F(1, 35) = 0.41, p = .53, \eta_p^2 = .012$ ,  
17 reached significance. Because results from the probe and search task did not match, further  
18 research is required to validate the idea that distractor suppression is weaker after repetition of  
19 the distractor.

### 20 **Trial run length and effects of task switches in Experiment 3**

21         We restricted the run length of the search task to 7 trials. As shown in supplementary  
22 Figure 1, this decreased the probability of a run length of 1-2 and increased the probability of  
23 run lengths between 3-7. As the goal of the probe task was to reflect the distribution of  
24 attention on search trials, these changes are desirable as very short runs are likely to disturb the  
25 search strategy and very long runs do not contribute to the probe task.

26

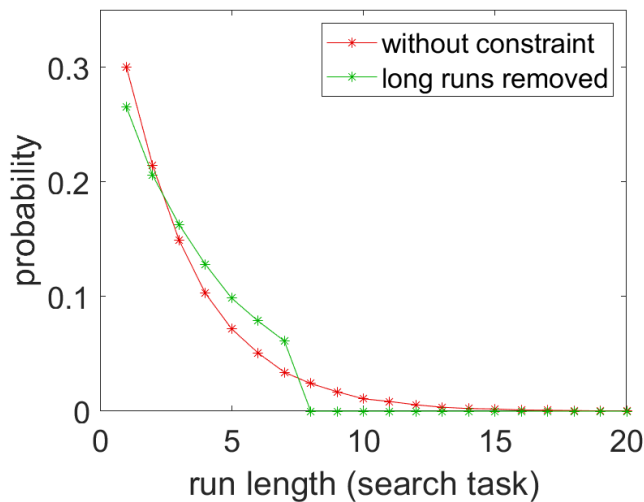

1  
2  
3 **Supplementary Figure 1.** Probability of different run lengths without constraint on run length  
4 and with runs longer than 7 removed. Probabilities were estimated by simulations with 1,000  
5 iterations.

6  
7 Because we had manipulated the distribution of task switches, we evaluated effects of  
8 task switches on the probe and search tasks. To assess effects of task switches on percentages  
9 correct in the crucial comparison of distractor and nontarget stimuli, we submitted percentages  
10 correct to a 2 (shape: distractor, nontarget) x 2 (task on trial n-1: same, different) repeated-  
11 measures ANOVA. Performance was better when the task on trial n-1 was the same compared  
12 to when it switched (84.4% vs. 77.5%),  $F(1, 32) = 19.93, p < .01, \eta_p^2 = .363$ . As in the analysis  
13 reported in the main text, there was no difference between distractor and nontarget locations  
14 (79.8% vs. 82.0%),  $F(1, 35) = 2.47, p = .13, \eta_p^2 = .066$ . Importantly, there was no interaction,  $F(1,$   
15  $35) < 0.01, p = .99, \eta_p^2 < .001$ , suggesting that effects of shape and task on trial n-1 were  
16 additive.

17 In addition, we evaluated effects of task switches on RTs in the search task. To this end,  
18 we conducted a 2 (distractor: present, absent) x 2 (task on trial n-1: same, different) repeated-  
19 measures ANOVA on the RTs from the search task in Experiment 3. RTs were shorter on  
20 distractor-present than -absent trials (734 vs. 746 ms),  $F(1, 35) = 5.34, p = .03, \eta_p^2 = .132$ ,  
21 mirroring the results in the main text. RTs were also shorter when the task on trial n-1 was the

1 same compared to when it was different (655 vs. 825 ms),  $F(1, 35) = 122.61$ ,  $p < .01$ ,  $\eta_p^2 = .778$ .  
2 However, the interaction was not significant,  $F(1, 35) = 0.61$ ,  $p = .44$ ,  $\eta_p^2 = .017$ , showing that  
3 task switching slowed responses, but did not affect the distribution of attention. Additive effects  
4 of task switching are consistent with a previous report showing that indicators of attentional  
5 capture in feature search did not change as a function of switch likelihood (Sali & Key, 2021).

6

7

### References

- 8 Becker, S. I. (2007). Irrelevant singletons in pop-out search: Attentional capture or filtering costs? *Journal*  
9 *of Experimental Psychology: Human Perception and Performance*, 33(4), 764-787.  
10 <https://doi.org/10.1037/0096-1523.33.4.764>
- 11 Sali, A. W., & Key, J. (2021). Measuring attentional capture across learned states of cognitive flexibility.  
12 *Journal of Vision*, 21(9), 2875-2875. <https://doi.org/10.1167/jov.21.9.2875>
- 13  
14 Theeuwes, J., & Burger, R. (1998). Attentional control during visual search: The effect of irrelevant  
15 singletons. *Journal of Experimental Psychology-Human Perception and Performance*, 24(5), 1342-  
16 1353. <https://doi.org/10.1037/0096-1523.24.5.1342>
- 17  
18 Zivony, A., & Lamy, D. (2018). Contingent Attentional Engagement: Stimulus- and Goal-Driven Capture  
19 Have Qualitatively Different Consequences. *Psychological Science*, 29(12), 1930-1941.  
20 <https://doi.org/10.1177/0956797618799302>
- 21  
22  
23
